1 RUNNING TITLE: Hyporheic zone hotspot mechanisms

2

3 Multi ‘omics comparison reveals metabolome biochemistry, not microbiome composition or  
4 gene expression, corresponds to elevated biogeochemical function in the hyporheic zone

5

6 Emily B. Graham<sup>1</sup>, Alex R. Crump<sup>2</sup>, David W. Kennedy<sup>1</sup>, Evan Arntzen<sup>1</sup>, Sarah Fansler<sup>1</sup>,  
7 Samuel O. Purvine<sup>3</sup>, Carrie D. Nicora<sup>3</sup>, William Nelson<sup>1</sup>, Malak M. Tfaily<sup>3</sup>, and James C.  
8 Stegen<sup>1</sup>

9

10 <sup>1</sup>Pacific Northwest National Laboratory, Richland, WA USA

11 <sup>2</sup>University of Idaho, Moscow, ID USA

12 <sup>3</sup>Environmental Molecular Science Laboratory, Richland, WA USA

13

14 **Correspondence:** Emily B. Graham, Pacific Northwest National Laboratory, PO Box 999,  
15 Richland, WA 99352, 509-372-6049, emily.graham@pnnl.gov

16

17 **Keywords:** FT-ICR-MS; respiration; coupled C-N cycles; carbon cycle; riparian;

18 hydrobiogeochemistry

19

20

21 **Abstract.**

22 Biogeochemical hotspots are pervasive at terrestrial-aquatic interfaces, particularly within  
23 groundwater-surface water mixing zones (hyporheic zones), and they are critical to  
24 understanding spatiotemporal variation in biogeochemical cycling. Here, we use multi 'omic  
25 comparisons of hotspots to low-activity sediments to gain mechanistic insight into hyporheic  
26 zone organic matter processing. We hypothesized that microbiome structure and function, as  
27 described by metagenomics and metaproteomics, would distinguish hotspots from low-activity  
28 sediments through a shift towards carbohydrate-utilizing metabolic pathways and elucidate  
29 discrete mechanisms governing organic matter processing in each location. We also expected  
30 these differences to be reflected in the metabolome, whereby hotspot carbon (C) pools and  
31 metabolite transformations therein would be enriched in sugar-associated compounds. In contrast  
32 to expectations, we found pronounced phenotypic plasticity in the hyporheic zone microbiome  
33 that was denoted by similar microbiome structure, functional potential, and expression across  
34 sediments with dissimilar metabolic rates. Instead, diverse nitrogenous metabolites and  
35 biochemical transformations characterized hotspots. Metabolomes also corresponded more  
36 strongly to aerobic metabolism than bulk C content only (explaining 67% vs. 42% of variation),  
37 and bulk C did not improve statistical models based on metabolome composition alone. These  
38 results point to organic nitrogen as a significant regulatory factor influencing hyporheic zone  
39 organic matter processing. Based on our findings, we propose incorporating knowledge of  
40 metabolic pathways associated with different chemical fractions of C pools into ecosystem  
41 models will enhance prediction accuracy.

42 **1. Introduction.**

43           Soils and nearshore sediments contain a vast reservoir of stored carbon. Uncertainty in  
44 the fate of these stores is central to constraining future atmospheric CO<sub>2</sub> concentrations (Burd et  
45 al., 2016; Luo et al., 2016; Todd-Brown et al., 2013). Advances in molecular technology has  
46 given researchers new ability to characterize mechanisms governing carbon (C) bioavailability,  
47 and ultimately the conversion of belowground C pools to CO<sub>2</sub>. These advances are central to  
48 ongoing efforts to improve process-based ecosystem models by incorporating microbial and  
49 biochemical complexity in biogeochemical processes (Buchkowski et al., 2017; Luo et al., 2016;  
50 Wieder et al., 2013; Wieder et al., 2017). Still, there is little consensus on the roles of diverse  
51 environmental and microbial factors in enhancing belowground CO<sub>2</sub> flux predictions (Graham et  
52 al., 2016b; Graham et al., 2014; Luo et al., 2016; Rocca et al., 2015; Wieder et al., 2017), and  
53 understanding the mechanisms regulating biogeochemistry in natural environments is paramount  
54 to conceptualizing the structure and parameterization of models (Luo et al., 2016; Todd-Brown  
55 et al., 2013; Wieder et al., 2013).

56           Recent research has vastly improved both molecular methodologies (Aebersold and  
57 Mann, 2003; Gabor et al., 2014; Tfaily et al., 2017; Tringe and Rubin, 2005; Viant, 2008; Wang  
58 et al., 2009) and biogeochemical mechanisms represented in ecosystem models (Allison et al.,  
59 2010; Wieder et al., 2015a; Wieder et al., 2013; Xu et al., 2014). For instance, parallel advances  
60 in environmental chemistry and microbiology now allow for detailed characterization of  
61 belowground C pools (e.g., fluorescent methods (Gabor et al., 2014), high-resolution mass  
62 spectroscopy (Tfaily et al., 2017), and nuclear magnetic resonance (NMR) (Markley et al.,  
63 2017)) as well as the structure and function of environmental microbiomes (Aebersold and  
64 Mann, 2003; Tringe and Rubin, 2005; Wang et al., 2009). Newly improved process models

65 account for chemical attributes of C (Liski et al., 2005; Wang et al., 2017), microbial biomass  
66 and physiology (Wieder et al., 2014; Wieder et al., 2015a), and nutrient limitations (Wieder et  
67 al., 2015b) in their representations of biogeochemistry, among other factors (Verheijen et al.,  
68 2015; Wang et al., 2017). Despite these advances, cross-system experimental evidence has  
69 revealed many inconsistencies in the importance of different biogeochemical and microbial  
70 properties explaining respiration rates (Graham et al., 2016b; Graham et al., 2017b; Hartman et  
71 al., 2017), suggesting a need for greater spatially-explicit understanding of mechanisms involved  
72 in organic matter processing (Graham et al., 2017b; Krause et al., 2017).

73 Terrestrial-aquatic interfaces are recognized active regions of C metabolism, and areas of  
74 subsurface groundwater-surface water mixing (hyporheic zones) in particular are critical in  
75 determining the fate of organic matter globally (Battin et al., 2009; Boulton et al., 1998; Cole et  
76 al., 2007; Marín-Spiotta et al., 2014; Regnier et al., 2013). Hyporheic zones contribute  
77 disproportionately to stream and river metabolism (Gomez-Velez et al., 2015; Huizenga et al.,  
78 2017; Stegen et al., 2016; Stern et al., 2017), with up to 96% of ecosystem metabolism occurring  
79 in this zone in some headwater systems (Naegeli and Uehlinger, 1997). Hotspots and hot  
80 moments of enhanced biogeochemical activity at confined locations or time points are common  
81 within the hyporheic zone (Boulton et al., 1998; Krause et al., 2017; McClain et al., 2003). These  
82 hotspots often correspond to vegetation patterns (Harms and Grimm, 2008; McClain et al., 2003;  
83 Schade et al., 2001) and understanding their drivers is critical to accurately representing organic  
84 matter decomposition within ecosystem models.

85 Our objective is to determine molecular mechanisms associated with hotspots of aerobic  
86 metabolism in the hyporheic zone. Previous work in this system has shown differences in (1)  
87 aerobic metabolism across variable mixing of water bodies with distinct C chemistries (Stegen et

88 al., 2016; Stegen et al., 2018) and (2) metabolic processes associated with C oxidation in the  
89 presence or absence of vegetation (Graham et al., 2017b). Recent work has also shown that  
90 elevated rates of metabolism globally correspond to carbohydrate metabolism in soil  
91 metagenomes (Hartman et al., 2017). Based on this research, we hypothesize that microbiome  
92 structure and function support elevated carbohydrate metabolism in hyporheic zone hotspots,  
93 resulting in higher rates of aerobic metabolism. We expect this dynamic to be reflected in  
94 sediment metagenomes, metaproteomes, and metabolomes, whereby hotspot microbiome  
95 composition, protein expression, and metabolites are enriched in sugar-associated pathways and  
96 compounds, relative to low-activity sediments.

97

## 98 **2. Materials and Methods.**

### 99 *2.1. Site Description*

100 This study was conducted along the Columbia River shoreline within the Hanford 300  
101 Area (approximately 46° 22' 15.80"N, 119° 16' 31.52"W) in eastern Washington State (Graham  
102 et al., 2016a; Graham et al., 2017a; Graham et al., 2017b; Slater et al., 2010; Zachara et al.,  
103 2013). The Columbia River experiences shoreline geographic variation in vegetation patterns,  
104 substrate geochemistry, microbiome composition, and rates of biogeochemical activity (Arntzen  
105 et al., 2006; Graham et al., 2017b; Lin et al., 2012; Peterson and Connelly, 2004; Slater et al.,  
106 2010; Stegen et al., 2016; Stegen et al., 2012; Zachara et al., 2013); constituting an ideal system  
107 for examining mechanisms associated with biogeochemical hotspots.

108 Liquid N<sub>2</sub>-frozen sediment profiles (0-60 cm) were collected along two shoreline  
109 transects perpendicular to the Columbia River in March 2015, separated by a distance of ~170m.  
110 We collected profiles at three locations in each transect with 5m spacing within a spatial domain

111 of ~175 x 10m. In each transect, the lower bank profile was located at ~0.5m (vertical distance)  
112 below the water line and the upper bank profile was located ~0.5m (vertical distance) above the  
113 water line (approximately 10m horizontal distance), with the third profile situated at the  
114 midpoint. Each profile was sectioned into 10-cm intervals from 0-60cm. To capture a range of  
115 biogeochemical activities, one transect had dense vegetation, consisting of a closed canopy of  
116 woody perennials *Morus rubra* (Red Mulberry) and *Ulmus rubra* (Slippery Elm), and one  
117 transect was characterized by a cobbled armor layer with virtually no vegetation.

118

## 119 2.2. *Sample Collection*

120 Liquid N<sub>2</sub>-frozen sediment profiles were collected as outlined in Moser et al. (2003)  
121 using a method modified from Lotspeich and Reed (1980) and Rood and Church (1994). A  
122 pointed stainless steel tube (152 cm length, 3.3 cm outside diameter, 2.4 cm inside diameter) was  
123 driven into the river bed to a depth of ~60cm. Liquid N<sub>2</sub> was poured down the tube for ~15  
124 minutes, until a sufficient quantity of material had frozen to the outside of the tube. The tube and  
125 attached material were removed from the riverbed with a chain hoist suspended beneath a tripod.  
126 Profiles were placed over an aluminum foil lined cooler containing dry ice. Frozen material was  
127 removed with a mallet. The material was then wrapped in the foil and transported on dry ice to  
128 storage at -80°C. In the lab, profiles were sectioned into 10cm depth intervals from 0-60 cm (n =  
129 6 per profile, except for the unvegetated upper bank profile which was sectioned only from 30-  
130 60cm; total n = 33)

131

## 132 2.3. *Physicochemistry*

133           Details concerning physicochemical assays are provided in the Supporting Information.  
134   Briefly, we determined the particle distribution of sediments by separating size fractions via  
135   sieving; total nitrogen, sulfur, and carbon content were determined using an Elementar vario EL  
136   cube (Elementar Co.Germany);  $\text{NH}_4^+$  was extracted with KCl and measured with Hach Kit  
137   2604545 (Hach, Loveland, Co); iron content was measured with a ferrozine assay; and all other  
138   ion concentrations were measured by inductively coupled plasma mass spectrometry (ICP-MS)  
139   on HCl extractions. Aerobic metabolism was determined with a resazurin reduction assay,  
140   modified from *Haggerty et al.*(2009). Data are provided in Fig. S1-S3.

141

#### 142   2.4. FT-ICR-MS solvent extraction and data acquisition

143           We leverage state of science chemical extraction protocols combined with Electrospray  
144   ionization (ESI) and Fourier transform ion cyclotron resonance (FT-ICR) mass spectrometry  
145   (MS) to infer differences in metabolites among our samples. ESI FT-ICR-MS introduces intact  
146   organic molecules into the MS without fragmentation and allows for the detection of a wide  
147   range of chemical compounds (Tfaily et al., 2015; Tfaily et al., 2017). The use of 12 Tesla (T)  
148   FT-ICR-MS offers high mass resolving power ( $>1\text{M}$ ) and mass measurement accuracy ( $<1$  ppm),  
149   and while nascent in its application within complex environmental systems, it has emerged as a  
150   robust method for determining the chemistry of natural organic compounds (Kim et al., 2003;  
151   Koch et al., 2005; Tfaily et al., 2011; Tremblay et al., 2007). Additionally, Tfaily et al. (2015;  
152   2017) have optimized metabolite characterization from soils and sediments by sequential  
153   extraction with polar and non-polar solvents tailored to the sample set of interest. Tfaily's  
154   extraction procedures have been coupled to ESI FT-ICR-MS to distinguish metabolites among  
155   ecosystems and soil types (Tfaily et al., 2015; Tfaily et al., 2017) as well as to provide

156 information on the utilization of distinct metabolites among samples within a single environment  
157 (Bailey et al., 2017; Graham et al., 2017b; Stegen et al., 2018).

158 Here, we used three solvents with different polarities —water (H<sub>2</sub>O), methanol (CH<sub>3</sub>OH,  
159 ‘MeOH’) and chloroform (CHCl<sub>3</sub>)—to sequentially extract a large diversity of organic  
160 compounds from samples, according to Tfaily et al. (2015; 2017). Water extractions were  
161 performed first, followed by MeOH and then CHCl<sub>3</sub>. Previous work has shown that each solvent  
162 is selective towards specific types of compounds (Tfaily et al., 2015) and that combining peaks  
163 from all extractions provides a more comprehensive description of metabolite composition than  
164 any single extraction procedure independently (Tfaily et al., 2017). Water is a polar solvent with  
165 a selection bias for carbohydrates with high O/C ratios, amino-sugars, and other labile polar  
166 compounds (Tfaily et al., 2015). Conversely, CHCl<sub>3</sub> is selective for non-polar lipids associated  
167 with mineral interactions and cellular membranes (Tfaily et al., 2015). Methanol has a polarity in  
168 between that of water and CHCl<sub>3</sub> and extracts a mixture of compounds that water and CHCl<sub>3</sub>  
169 extract (Tfaily et al., 2015). Ultra-high resolution mass spectrometry of the three different  
170 extracts from each sample was carried out using a 12 Tesla Bruker Solarix FT-ICR-MS located  
171 at the Environmental Molecular Sciences Laboratory (EMSL) in Richland, WA, USA. An  
172 expanded description of extraction procedures; instrument calibration and maintenance; and  
173 sample injection is presented in the Supplemental Material.

174

### 175 *2.5. FT-ICR-MS data processing*

176 One hundred forty-four individual scans were averaged for each sample and internally  
177 calibrated using an organic matter homologous series separated by 14 Da (–CH<sub>2</sub> groups). The  
178 mass measurement accuracy was less than 1 ppm for singly charged ions across a broad *m/z*



179 range (100-1200  $m/z$ ). The mass resolution was  $\sim 350K$  at 339  $m/z$ . Data Analysis software  
180 (BrukerDaltonik version 4.2) was used to convert raw spectra to a list of  $m/z$  values applying  
181 FTMS peak picker module with a signal-to-noise ratio (S/N) threshold set to 7 and absolute  
182 intensity threshold to the default value of 100.

183 For each sample, we combined peaks detected in all three extractions to yield metabolite  
184 composition. Peak data were treated as presents/absence data, where a peak was considered to be  
185 present in a sample if it was present in at least one of H<sub>2</sub>O-, MeOH-, or CHCl<sub>3</sub>-extracted  
186 samples. Presence/absence data were used because peak intensity differences are reflective of  
187 ionization efficiency as well as relative abundance (Kujawinski and Behn, 2006; Minor et al.,  
188 2012; Tfaily et al., 2015; Tfaily et al., 2017).

189 Putative chemical formulae were then assigned using in-house software following the  
190 Compound Identification Algorithm (CIA), proposed by Kujawinski and Behn (2006), modified  
191 by Minor et al. (2012), and previously described in Tfaily et al. (2017). Chemical formulae were  
192 assigned based on the following criteria: S/N >7, and mass measurement error <1 ppm, taking  
193 into consideration the presence of C, H, O, N, S and P and excluding other elements. To ensure  
194 consistent formula assignment, we aligned all sample peak lists for the entire dataset to each  
195 other in order to facilitate consistent peak assignments and eliminate possible mass shifts that  
196 would impact formula assignment. We implemented the following rules to further ensure  
197 consistent formula assignment: (1) we consistently picked the formula with the lowest error and  
198 with the lowest number of heteroatoms and (2) the assignment of one phosphorus atom requires  
199 the presence of at least four oxygen atoms.

200 The chemical character of thousands of peaks in each sample's ESI FT-ICR-MS  
201 spectrum was evaluated on van Krevelen diagrams. Compounds were plotted on the van

202 Krevelen diagram on the basis of their molar H:C ratios (y-axis) and molar O:C ratios (x-axis)  
203 (Kim et al., 2003). Van Krevelen diagrams provide a means to visualize and compare the average  
204 properties of organic compounds and assign compounds to the major biochemical classes (e.g.,  
205 lipid-, protein-, lignin-, carbohydrate-, and condensed aromatic-like).

206

## 207 *2.6. Identification of putative biochemical transformations using FT-ICR-MS*

208 To identify potential biochemical transformations, we followed the procedure detailed by  
209 Breitling *et al.* (2006) and employed by Bailey *et al.* (2017), Graham *et al.* (2017b), and Stegen  
210 *et al.* (2018). The mass difference between m/z peaks extracted from each spectrum with S/N>7  
211 were compared to commonly observed mass differences associated with biochemical  
212 transformations. All possible pairwise mass differences were calculated within each extraction  
213 type for each sample, and differences (within 1ppm) were matched to a list of 92 common  
214 biochemical transformations (e.g., gain or loss of amino groups or sugars, Table S1). For  
215 example, a mass difference of 99.07 corresponds to a gain or loss of the amino acid valine, while  
216 a difference of 179.06 corresponds to the gain or loss of a glucose molecule. Pairs of peaks with  
217 a mass difference within 1 ppm of our transformation list were considered to be related by the  
218 corresponding compound. This approach is feasible with FT-ICR-MS data because the set of  
219 peaks in each sample are related by measureable and clearly defined mass differences  
220 corresponding to gains and losses of compounds.

221

## 222 *2.7. Metagenome sequencing and annotation*

223 To release biomass from sediment particles, thawed samples were suspended in 20mL of  
224 chilled PBS/0.1% Na-pyrophosphate solution and vortexed for 1 min. The suspended fraction

225 was decanted to a fresh tube and centrifuged for 15' at 7000 x g at 10°C. DNA was extracted  
226 from the resulting pellets using the MoBio PowerSoil kit in plate format (MoBio Laboratories,  
227 Inc., Carlsbad, CA) following manufacturer's instructions, with the addition of a 2-hour  
228 proteinase-K incubation at 55°C prior to bead-beating to facilitate cell lysis.

229 Purified genomic DNA was submitted to the Joint Genome Institute under JGI/EMSL  
230 proposal 1781 for paired-end sequencing on an Illumina HiSeq 2500 sequencer (Table S2).  
231 Reads were processed by BBDuk to remove adapters (ktrim=r, minlen=40, minlenfraction=0.6,  
232 mink=11, tbo, tpe, k=23, hdist=1, hdist2=1, ftm=5) and trim for quality <12 (maq=8, maxns=1,  
233 minlen=40, minlenfraction=0.6, k=27, hdist=1, trimq=12, qtrim=rl) and screened for  
234 contaminants against a masked version of human HG19 using BMap (fast local minratio=0.84  
235 maxindel=6 tipsearch=4 bw=18 bwr=0.18 usemodulo printunmappedcount idtag minhits=1).  
236 (BBDuk and BMap are available at <https://sourceforge.net/projects/bbmap>) Remaining reads  
237 were assembled with megahit (Li et al., 2016) using default parameters and k-list=23,43,63,  
238 83,103,123. Gene calling and functional and taxonomic annotation was performed by MGAP  
239 v4.11.4 (Huntemann et al., 2015). Data sets are available through the JGI Genome Portal  
240 (<http://genome.jgi.doe.gov>). Project identifiers are listed in Table S2.

241

## 242 *2.8. Metaproteomics.*

243

244 Sediment samples were prepared for proteome analysis as per Nicora et al. (in press) and  
245 detailed below. Additional details are provided in the Supplemental Material.

246 Proteins were extracted from 30 g of lyophilized sediment using MPLex direct SDS  
247 buffer extraction. Sediment was weighed into 50 mL screw-cap self-standing tubes (Next

248 Advance, Averill Park, NY) along with 0.9-2.0 mm stainless steel beads, 0.1 mm zirconia beads  
249 and 0.1 mm garnet beads and 8 mL of 60% MeOH in nanopure water. The samples were all bead  
250 beat in a 50mL Bullet Blender (Next Advance, Averill Park, NY) at speed 12 for 15 minutes at  
251 4°C and transferred into chemical compatible polypropylene 50 mL tubes (Olympus Plastics,  
252 Waltham, MA). The dirty tube was rinsed with 2 mL of 60% MeOH and combined with the  
253 sample along with 12 mL of ice-cold chloroform and probe sonicated at 60% amplitude for 30  
254 seconds on ice, allowed to cool on ice and sonicated again. Samples were incubated for 5 min at-  
255 80°C, vortexed for 1 min and centrifuged at 4,500x g for 10 min at 4°C. The upper aqueous  
256 phase was collected into a large glass vial, being careful not to touch the protein interphase. The  
257 interphase was collected using a large flat spatula into a separate tube and 5mL of ice cold 100%  
258 methanol was added to the protein, vortexed and centrifuged at 4,500x g for 5 mins at 4°C to  
259 pellet the protein. The supernatant was decanted off and the protein allowed to dry upside down  
260 on a Kim-wipe. Meanwhile, the bottom organic phase was collected into a separate large glass  
261 vial and 5mL of nanopure water was added to the large soil particulates along with 25mL of cold  
262 (-20 °C) chloroform:methanol (2:1, v:v) solution and probe sonicated for 30 seconds as  
263 described previously. The sample was allowed to cool at -20°C and centrifuged at 4,500x g for  
264 10 min at 4°C. The upper aqueous phase metabolites and bottom organic phase lipids were  
265 collected together with the supernatant metabolites and lipids then dried down completely in a  
266 vacuum concentrator (Labconco, Kansas City, MO) and stored at -20 °C for analysis. The dirty  
267 protein interphase had 20 mL of an SDS-Tris buffer (4% SDS, 100mM DTT in 100 mM Tris-  
268 HCl, pH 8.0) added and probe sonicated at 20% amplitude to bring into solution and incubated at  
269 95°C for 5 minutes to solubilize the protein and allowed to cool for 20 mins at 4°C. The samples  
270 were centrifuged at 4,500x g for 10 mins and the supernatants were decanted into chemical

271 compatible polypropylene 50 mL tubes. The proteins were precipitated by adding up to 20%  
272 trichloroacetic acid (TCA), vortexed and placed in a -20°C freezer for 1.5 hrs. The samples were  
273 thawed and centrifuged at 4,500x g at 4°C for 10 mins to collect the precipitated protein. The  
274 supernatant was gently decanted into waste and 2 mL of ice cold acetone was added to the pellet  
275 and re-suspend by vortexing. The sample was placed at -80°C for ~5 mins to ensure the samples  
276 were cold and centrifuged for 10 mins at 4,500x g at 4°C. The acetone was removed by gently  
277 pouring into waste. The pellets were allowed to dry inverted on a Kim Wipe for ~15 mins. The  
278 protein interphases from the supernatants and the protein interphases from the particulates were  
279 combined using 100-200ul of SDS-Tris buffer and FASP digested (described in the  
280 Supplemental Material).

281 Extractions were analyzed on a Q-Exactive Plus mass spectrometer (Thermo Electron,  
282 Waltham, MA) coupled to a Waters NanoAcquity high performance liquid chromatography  
283 systems (Waters Corporation, Milford, MA) through 75 um x 70 cm columns packed with  
284 Phenomenex Jupiter C-18 derivatized 3 um silica beads (Phenomenex, Torrance, CA). Samples  
285 were loaded onto columns with 0.05% formic acid in water and eluted with 0.05% formic acid in  
286 Acetonitrile over 100 minutes. Ten data-dependent MS/MS scans (17.5K resolution, centroided)  
287 were recorded for each survey MS scan (35K resolution) using normalized collision energy of  
288 30, isolation width of 2.00, and rolling exclusion window of +/- 1 Th lasting 30 seconds before  
289 previously fragmented signals are eligible for re-analysis.

290 For protein identification, a single reference protein file was developed from the  
291 combination of 33 metagenome files ('assembled.faa' and 'product\_names' files) available from  
292 the Joint Genome Institute (JGI Project IDs and related download links in Supplemental  
293 Material). Exact sequence duplicates were removed, and 16 commonly observed contaminants

294 (e.g. tryptic fragments, human keratins, and serum albumin precursors) were included. Final file  
295 contained 10,063,272 protein entries from 1,299,102,456 amino acids, 2.04GB in size.

296 The MS/MS spectra from all LC-MS/MS datasets were converted to ASCII text (.dta  
297 format) using MSConvert (<http://proteowizard.sourceforge.net/tools/msconvert.html>) which  
298 more precisely assigns the charge and parent mass values to an MS/MS spectrum. The data files  
299 were then interrogated via target-decoy approach  
300 (<http://www.ncbi.nlm.nih.gov/pubmed/20013364>) using MSGFPlus  
301 (<http://www.ncbi.nlm.nih.gov/pubmed/25358478>) using a +/- 20 ppm parent mass tolerance,  
302 partially tryptic digestion enzyme settings, and a variable posttranslational modification of  
303 oxidized Methionine. All MS/MS search results for each dataset were collated into tab separated  
304 ASCII text files listing the best scoring identification for each spectrum.

305 Collated search results were further combined into a single result file. These results were  
306 imported into a Microsoft SQL Server database. Results were filtered to >1% FDR using an  
307 MSGF+ supplied Q-Value that assesses reversed sequence decoy identifications for a given  
308 MSGF score across each dataset. Using the protein references as a grouping term, unique  
309 peptides belonging to each protein were counted, as were all peptide spectrum matches (PSMs)  
310 belonging to all peptides for that protein (i.e. a protein level observation count value). PSM  
311 observation counts reported for each sample that was analyzed. Cross-tabulation tables were  
312 created to enumerate protein level PSM observations for each sample, allowing low-precision  
313 quantitative comparisons to be made. Identified proteins were searched against dbCAN v5 (Yin  
314 et al., 2012) using hmmer v3.1 (Finn et al., 2011). CAZy families were assigned based on cutoff  
315 suggestions of the maintainers of dbCAN. We removed singletons and proteins not present in at

316 least 25% of samples prior to statistical analysis. Samples with less than 10 total protein counts  
317 ( $n = 4$ ) were removed from our dataset to yield 29 samples.

318

### 319 *2.9. Statistical analyses.*

320 After removing samples with low protein detection, we retained 29 samples for statistical  
321 analyses. To identify hotspots vs. low-activity sediments, we examined the distribution of  
322 aerobic metabolism rates in all 29 samples (Fig. S4). The distribution was approximately normal  
323 with a minimum of 361.83, a mean of 810.49, and a maximum of 1472.86. We defined low-  
324 activity sediments as those falling in the bottom quartile of the distribution (maximum rate of  
325 aerobic metabolism: 619.45) and high activity samples as those falling in the top quartile of the  
326 distribution (minimum rate of aerobic metabolism: 1033.66), yielding a sample size of 7 for each  
327 set of samples. All statistical analyses were conducted using R software ([https://www.r-](https://www.r-project.org/)  
328 [project.org/](https://www.r-project.org/)) and graphics were generated with either base packages or ‘ggplot2.’

329 We used two approaches to determine differences in the composition of metabolites,  
330 microbial phylogenies, metagenomic functional potential (i.e., all annotated genes), and  
331 metaproteomes between hotspots and low-activity sediments. Metabolomes were analyzed as  
332 present/absence data, and all other data types were analyzed as relative abundances. First, we  
333 examined differences in full compositional profiles across groups using permutational  
334 multivariate analysis of variance (PERMANOVA, 999 permutations, ‘vegan’ package) and  
335 accounting for potential non-independence between samples within the same core by stratifying  
336 this analysis by depth (as per Graham et al., 2017b). Because metabolite data were in  
337 presence/absence form, a Sorenson dissimilarity distance was constructed and used to compare

338 metabolite data. All other datasets were analyzed using Bray-Curtis dissimilarity to account for  
339 differences in relative abundance.

340         Secondly, we used linear mixed effect models to investigate variation in specific  
341 microbial attributes between hotspots and low-activity sediments. Following the convention of  
342 Graham et al. (2017b), we included depth as a random effect in these models to account for  
343 possible non-independence among sediments. A given microbial attribute was the dependent  
344 variable and sediment type was the independent variable. Mixed models were compared to null  
345 expectations (i.e., a model including only random effects) with analysis of variance (ANOVA) to  
346 determine significance. For significant models ( $P < 0.05$ ),  $R^2$  values for microbial attributes  
347 independently and for the entire mixed model (i.e., the effects of the attribute plus depth) were  
348 determined with the 'r.squaredGLMM' function in the 'MuMIn' package (Barton, 2009).  
349 Because few compounds differed across activity levels, P-values were not adjusted for multiple  
350 comparisons in order to maximize the likelihood of detecting differences.

351         We selected specific attributes for analysis as follows: For metabolomic data, we grouped  
352 peaks by their Van Krevlen assignment and compared the relative abundance of each Van  
353 Krevlen class across activity groups (e.g., the relative abundance of amino sugars in hotspots vs.  
354 low-activity sediments). To identify specific microbial phylogenetic and functional groups of  
355 interest, we employed the following procedure: (1) we ranked the relative abundance of each  
356 assigned phylogeny (class level) or functional annotation (pfam, COG, and KEGG) within each  
357 sample; (2) we compiled a master list containing the 25 most abundant phylogenies or functional  
358 annotations in every sample; and (3) we determined the relative abundance of every unique  
359 phylogeny or functional annotation in the master list within each sample. In this way, we  
360 examined every taxon or metabolic pathway that was present in high abundance in at least one



361 sample. For metaproteomic data, we employed a similar pipeline but because the proteomic  
362 dataset was smaller, we comprised our master list from any protein in the top 5% of relative  
363 abundance in a given sample (equivalent to more than 10 proteins per sample).

364 Because (1) metagenomes did not vary strongly between hotspots and low-activity  
365 sediments, (2) proteins are tightly coupled to function conceptually (i.e., they are proximate  
366 catalysts of reactions), and (3) metabolites were dramatically different across activity levels; we  
367 focused subsequent analyses only on metaproteomic and metabolomics data. We first  
368 investigated the extent to which metaproteome structure corresponded to metabolome structure  
369 in the full dataset ( $n = 29$ ) by comparing dissimilarity in metabolite composition (Sorenson  
370 dissimilarity) to differences in proteomic composition (Bray-Curtis dissimilarity, Mantel test  
371 using Spearman correlation and stratifying by depth). We also examined the extent to which each  
372 data type corresponded to changes in aerobic metabolism by fitting linear and quadratic mixed  
373 effects models across the full dataset. As above, depth was included as a random effect in each  
374 model. To reduce multidimensional metaproteomic and metabolomic data into vectors for model  
375 construction, we extracted the first two principle components of variation within data type (PCA  
376 analysis, 'prcomp'). PC1 and PC2 were predictors in the mixed effects models, and aerobic  
377 metabolism was the response variable. Mixed models were compared to null expectations (i.e.,  
378 models including only random effects) with ANOVA to determine significance.  $R^2$  values were  
379 determined with the 'r.squaredGLMM' function in the 'MuMIn' package. Since both PC1 and  
380 PC2 from metabolomes were significantly related to aerobic metabolism, we also constructed a  
381 model that included both PC1 and PC2 as predictors. Lastly, to examine additional explanatory  
382 power that could be gained by incorporating bulk C as predictors along with metabolite  
383 chemistry, we constructed a final model with PC1, PC2, and percent C. This model was

384 compared to the model with PC1 and PC2 only using ANOVA to determine if percent C  
385 significantly improved explanatory power of aerobic metabolism.

386 Finally, because metabolomes were most distinguishing between hotspots and low-  
387 activity sediments and corresponded to rates of aerobic metabolism, we concluded with set of  
388 analyses with metabolomic data only. We deciphered specific metabolites that distinguished  
389 hotspots from low-activity sediments using ‘random forest’ machine learning algorithm (Liaw  
390 and Wiener, 2002, ‘randomForest’ package). Forests were constructed using metabolite peaks  
391 that were assigned chemical formulae, removing singletons for computational limitations. For  
392 each forest, 1000 trees were constructed with replacement, and error rates converged near zero  
393 (Fig. S5). Peak importance and partial dependence in distinguishing high vs. low activity  
394 samples were calculated with the ‘imp’ and ‘PartialPlot’ functions, respectively. Peaks that were  
395 assigned a ‘Mean Decrease in Accuracy’ of greater than zero were considered to be  
396 distinguishing metabolites. This approach yielded 55 peaks distinguishing low activity samples  
397 and 272 peaks distinguishing high activity samples.

398 We also used metabolite transformations to infer biochemical processes associated with  
399 aerobic metabolism in hotspots. We identified transformations of interest using the following  
400 procedure: (1) we summed the relative abundance of each transformation across all samples (n =  
401 29) and (2) we chose the transformations whose abundance was in the top 20% of all  
402 transformations (18 out of 92, mean relative abundance: 1.6% to 14.5%). By doing so, we  
403 analyzed transformations that occurred most frequently in our dataset, irrespective of their  
404 occurrence within individual samples.

405 We then compared the relative abundance of specific transformations between hotspots  
406 and low-activity sediments using linear mixed effect models using the same procedure as for

407 abundant microbial phylogenies, metabolic pathways, expressed proteins, and metabolites  
408 (described above). Because many abundant transformations in hotspots seemed to contain  
409 nitrogen (N) while transformations in low-activity sediments did not, we also examined the role  
410 in nitrogenous compounds in biochemical transformations in hotspots. We separated  
411 transformations into those containing N and N-free transformations (Table S3 and S4) and  
412 determined the relative abundance of transformations in each sample that were either nitrogenous  
413 or N-free. We then compared the relative abundance of nitrogenous and N-free compounds  
414 between hotspots and low-activity sediments using mixed effects models. Because the  
415 distribution of transformations within nitrogenous and N-free categories was highly non-  
416 Gaussian, we applied a Box-Cox transformation to each data type ('boxCox' function in 'car'  
417 package, Sakia, 1992), and subsequently constructed linear mixed effects models. We further  
418 separated amino-acid nitrogenous transformations from non-amino acid nitrogenous  
419 transformations (hereafter 'complex N', Table S5 and S6), applied a Box-Cox transformation,  
420 and constructed linear mixed effects models with these data.

421

### 422 **3. Results.**

#### 423 *3.1. Multi 'Omic Differences across Rates of Aerobic Metabolism*

424 Microbiome structure, functional potential, and protein expression showed limited  
425 differences between hotspots vs. low-activity sediments. No significant difference was observed  
426 in the composition of microbiome phylogenies ( $P = 0.57$ , Fig. 1a), metagenomic annotations ( $P =$   
427  $0.69$ , Fig. 1b), and metaproteomes ( $P = 0.91$ , Fig. 1c) between hotspots and low-activity  
428 sediments (PERMANOVA). As well, major clades, pathways, and proteins were similar among  
429 sediments (Fig. 1).

430 Metabolome composition, however, differed between hotspots and low-activity samples  
431 ( $P = 0.01$ ,  $R^2 = 0.28$ , Fig. 1d, PERMANOVA). When grouped into major compound classes,  
432 hotspots contained more amino sugar- and protein-like metabolites ( $P < 0.05$ , Fig. 1d, mixed  
433 effects). Metabolite pool composition was uncorrelated to proteome structure ( $P = 0.62$ , Fig. S6,  
434 Mantel test across all samples).

435 Finally, when considering aerobic metabolism as a continuous variable, metabolome  
436 composition was tightly correlated to aerobic metabolism. The first two principle coordinates of  
437 metabolite pool composition had significant independent relationships with aerobic metabolism  
438 and together explained 67% of variation in aerobic metabolism (mixed effects,  $P$  (PC1, quad.) =  
439 0.0006 &  $P$  (PC2, linear) = 0.01,  $P$  (combined, linear)  $\ll 0.0001$ , Fig. 2a, Fig. S7). Statistical  
440 models including both bulk C and metabolite composition were not significantly different from  
441 models including metabolite composition alone ( $R^2$  0.73 vs. 0.67,  $P = 1$ ). Metaproteome  
442 composition was uncorrelated to aerobic metabolism despite representing the proximal catalysts  
443 of metabolic processes (mixed effects,  $P$  (PC1) = 0.29 &  $P$  (PC2) = 0.53, Fig. 2b).

444

### 445 *3.2. Distinguishing Metabolite Chemistry and Transformations*

446 Because hotspots were discriminated from low-activity sediments only in the  
447 metabolome, we examined metabolite pools to identify compounds and infer processes that  
448 distinguished hotspots from low-activity sediments. Hotspots were characterized by high  
449 molecular weight ( $P < 0.0001$ , Fig. 3a), chemically diverse (Fig. 3b) compounds. In particular,  
450 nitrogenous classes of compounds (i.e., amino sugars and proteins) were present in metabolites  
451 that described hotspots and absent from metabolites characterizing low activity sediments (Fig.  
452 3b).

453 Hotspots also exhibited a more even distribution of abundant biochemical  
454 transformations, indicating greater diversity of biogeochemical processes in these sediments  
455 relative to low-activity sediments (Fig. 4a). These transformations were inferred by comparing  
456 differences between peaks in FT-ICR-MS data to a database of known biochemical  
457 transformations (see section 2.6). Further, transformations involving nitrogenous compounds ( $P$   
458 = 0.03  $R^2$  = 0.26, Table S3), particularly those involving complex N ( $P$  = 0.04  $R^2$  = 0.20, Fig. 4b,  
459 Table S6)), were more prevalent in hotspots.

460

#### 461 **4. Discussion.**

462 Our multi ‘omics investigation of microbiome structure and function in hyporheic zone  
463 hotspots highlights the importance of vegetation in driving local-scale (<200m<sup>2</sup>) aerobic  
464 metabolism in the subsurface. Pronounced spatial heterogeneity in metabolism across our  
465 relatively small spatial domain (~175 x 10m) is inconsistent with representations of  
466 biogeochemical processes within ecosystem models that often aggregate environmental  
467 properties across similarly sized domains, and suggests a need for finer scale representation of  
468 processes in these models. Our research supports previous observations of relationships between  
469 riparian vegetation and hyporheic zone hotspots due to associated carbon and nutrient inputs  
470 (Harms and Grimm, 2008; McClain et al., 2003; Schade et al., 2001). For example, Kuglerova et  
471 al. (2014) demonstrated that increased vegetation growth corresponded to enhanced  
472 biogeochemical cycling in areas of the hyporheic zone experiencing maximal groundwater-  
473 surface water mixing. In our system, hotspots were disproportionately distributed within  
474 sediments underlying vegetation and exhibited up to 4 times the rate of aerobic metabolism in  
475 low-activity sediments despite a small sampling domain (Fig. S4).

476           Contrary to our hypothesis that microbiome composition (metagenomics) and expression  
477 (metaproteomics) would be shifted towards carbohydrate metabolism in hotspots, our results  
478 support a predominant role for phenotypic plasticity within sediment microbiomes. Phenotypic  
479 plasticity, whereby an organism encodes multiple metabolic pathways and adjusts the expression  
480 of each depending on environmental conditions, is common in free-living microbes and  
481 manifests as different metabolisms occurring in samples with the same genomic composition.  
482 Microbiome phylogeny and functional potential did not vary with the level of aerobic respiration  
483 in our sediments. While Hartman *et al.* (2017) demonstrated a consistent metagenomic shift from  
484 aromatic to carbohydrate metabolism with increased carbon turnover in global soils, we observed  
485 no such relationship in our sediments. A key difference between Hartman *et al.* (2017) and the  
486 present study is that Hartman *et al.* demonstrated decreased nutrient uptake with increased  
487 activity. In the present study, decreased nutrient uptake would correspond to fewer nitrogenous  
488 biochemical transformations, whereas we observed increasing activity of biochemical pathways  
489 involving nitrogen in hotspots vs. low-activity sediments. The lack of microbiome change in our  
490 study may therefore be constrained by N-limitation. For instance, if microbiomes in our  
491 sediments are always under strong selection for N-harvesting metabolisms, they would be  
492 structured to contain organisms with the ability to metabolize organic N (Craine et al., 2007;  
493 Moorhead and Sinsabaugh, 2006), regardless of the magnitude of available N.

494           Interestingly, while one would expect protein expression to correlate with changes in  
495 activity, we saw no such effect in our metaproteomic data. The long residence time of enzymes  
496 compared to hydrologic mixing may decouple expression from function in dynamic  
497 environments such as the hyporheic zone. Hydrologic exchange in the hyporheic zone occurs on  
498 relatively short time scales (commonly minutes to days), as well as longer seasonal exchanges,

499 and creates fleeting periods of nutrient availability (Cardenas et al., 2008; Fritz and Arntzen,  
500 2007; Sawyer and Cardenas, 2009; Zarnetske et al., 2011). Recent work in soils has shown that  
501 protein decay rates vary widely across enzymes and that some enzymes can persist more than 12  
502 weeks in soils (Schimel et al., 2017). Assuming a similar magnitude of decay in hyporheic zone  
503 sediments would generate a disconnect between protein expression and resource availability that  
504 may ultimately disassociate enzyme pool composition from respiration rates, leading to the lack  
505 of relationship between metaproteome composition and aerobic metabolism observed here.

506 Our results indicate that improved resolution into sediment metabolomes provides greater  
507 insight into sediment function than bulk C content at a given point in time. While there is a long  
508 history of constraining biogeochemical rates with standing resource pools, our work indicates  
509 that bulk C alone was an insufficient predictor of aerobic respiration (Fig. S8). Metabolite  
510 chemistry explained 67% of variation in aerobic metabolism (in comparison to 42% by bulk C  
511 pools, Fig. S8), and including bulk C content as a predictor in addition to metabolome  
512 composition did not improve the explanatory power of our statistical models. In particular,  
513 nitrogenous metabolites were associated with enhanced metabolism. We therefore suggest that  
514 metabolome composition can explain aerobic metabolism better than bulk C stocks in some  
515 systems and subsequently that new process-based model structures need to account for multiple  
516 C pools with various organic N content. For instance, current generation models incorporate  
517 mechanisms reflecting that certain C molecules (e.g., glucose) can enter microbial cells by  
518 passing directly through their cellular membranes, while larger molecules require secreted  
519 extracellular enzymes to break them down prior to microbial uptake (Wang et al., 2013; Wieder  
520 et al., 2014). Extending these new frameworks to further parse C chemistry by organic N content  
521 and associated metabolic pathways could advance the performance of these models.

522           Microbiomes associated with hyporheic zone hotspots metabolized a broader range of  
523 resources compared to microbiomes in low-activity sediments. Enhanced biogeochemical  
524 cycling can be achieved through microorganisms using different portions of resource pools  
525 (termed ‘resource partitioning’ or ‘niche complementarity’) in which diverse microorganisms use  
526 different portions of resource pools (Cardinale, 2011; Loreau and Hector, 2001; Schoener, 1974).  
527 Consistent with this mechanism, we show a divergence in active metabolic pathways (inferred  
528 from biochemical transformations) in hotspots compared to low-activity sediments. Thus, despite  
529 similar microbiome genomic content, hotspots seem to result from the expansion of realized  
530 niches of extant microbiomes. In this case, increased biogeochemical function arises through  
531 phenotypic plasticity.

532           Hotspots contained diverse metabolites, were distinguished from low-activity sediments  
533 by protein- and amino sugar- like metabolites, and exhibited higher instances of biochemical  
534 transformations involving organic N. It has been widely demonstrated that N availability can  
535 limit microbial activity (Treseder, 2008), resulting in slower decomposition and ecosystem  
536 organic matter processing (Averill and Waring, 2017; Weintraub and Schimel, 2003; Zhang et  
537 al., 2008); and previous work in this system has suggested a coupling of C and N cycles (Stegen  
538 et al., 2018). An excess of inorganic N relative to other N sources has also been demonstrated to  
539 shift microbial metabolism by suppressing oxidative enzyme synthesis (Edwards et al., 2011;  
540 Jian et al., 2016) and by changing the ratios of synthesized enzymes that degrade recalcitrant vs.  
541 labile organic matter (Moorhead and Sinsabaugh, 2006). Similarly our analysis of metabolite  
542 transformations supports different metabolic strategies among hotspot vs. low-activity  
543 microbiomes as well as a role for organic N in particular as a driver of aerobic metabolism in  
544 hotspots.



545           While C:N ratios do not reflect obvious N limitation in our system (means: 6.55 (hotspot)  
546 and 6.19 (low-activity)), these ratios can misrepresent chemical conditions experienced by  
547 microbiomes due to N absorption to soil matrices and by aggregation processes that physically  
548 separate N from microorganisms (Lützow et al., 2006; Sollins et al., 1996). For instance,  
549 Darrouzet-Nardi and Weintraub (2014) demonstrated that bulk methods of C and N  
550 determination such as those used here may overestimate N availability by 5-fold. As such,  
551 organic N may play a critical role in our system despite ratios of C:N in bulk sediments.

552           Moorhead and Sinsabaugh (2006) proposed a concept known as ‘microbial nitrogen  
553 mining’ in which microorganisms in environments with limited availability of labile N  
554 metabolize C to access organic N (Craine et al., 2007; Moorhead and Sinsabaugh, 2006).  
555 Microbial N mining should result in the preferential decomposition of organic N, and our results  
556 indicate that this process may contribute to high respiration rates in hyporheic zone hotspots.  
557 Consistent with N mining, we observed biochemical pathways involving nitrogenous  
558 compounds, and complex N in particular within hotspots, supporting previous observations that  
559 organic N increases the decomposition of organic matter (reviewed in Averill and Waring, 2017;  
560 Hu et al., 2001; Zhang et al., 2008). The metabolism of complex nitrogenous organic compounds  
561 specifically suggests that the breakdown of more chemically-complex organic material may be  
562 stimulated to facilitate microbial access to nitrogen and that more available labile C in vegetated  
563 sediments provides additional energy necessary to metabolize more chemically-complex  
564 nitrogenous molecules.

565           Based on our results, we propose a new conceptualization of hyporheic zone organic  
566 matter transformations in which greater resolution into C metabolites and associated metabolic  
567 pathways—beyond bulk C stocks and/or microbiome structure—is critical for predictive

568 hydrobiogeochemical models (Fig. 5). Phenotypic plasticity suggests (1) an ability for  
569 microbiomes to rapidly acclimate to environmental conditions, regardless of their underlying  
570 genomic content, and (2) that there may be limited contributions of metagenomic information to  
571 functional predictions in dynamic systems. Because compositional shifts in microbiomes are  
572 often on the order of days to months or longer (Balser and Firestone, 2005; Graham et al., 2016a;  
573 Poretsky et al., 2014; Waldrop and Firestone, 2006), the ability of microorganisms to adjust  
574 metabolic function to suit prevailing conditions without associated species turnover denotes that  
575 the timescale of microbiome response is not limited to these longer timescales and instead that  
576 microbial responses in some systems may be more tightly constrained by RNA transcription and  
577 translation (~minutes or less, Moran et al., 2013).

578 Further, we suggest that broader metabolic activity in biogeochemical hotspots stimulates  
579 the production and consumption of diverse metabolites which alter the composition of future  
580 resource pools, and therefore that understanding subsequent feedbacks between metabolite  
581 consumption and production is vital for predictive biogeochemical models. For example, as  
582 metabolism proceeds through time, future metabolic rates are dependent on the resources (i.e.,  
583 metabolites) generated by these pathways. Metabolism of an expanded suite of resources through  
584 broader realized niche space within biogeochemical hotspots may therefore fundamentally  
585 change the subsequent metabolite and resource profiles (Fig. 5). As hotspots and hot moments  
586 occur through time and space, resource pools progressively change in ways that are dependent on  
587 microbial transformations of prior resource pools, and knowledge about the specific metabolic  
588 pathways that generate propagating changes as well as their rates and limitations is imperative  
589 for improving biogeochemical predictions. Our results also demonstrate organic N in particular  
590 may be involved these alternative pathways, and thus, that nutrient limitations are important

591 considerations in constraining rates within predictive models, as has been recently explored by  
592 Wieder et al (2015b). We further extended this conceptualization to propose that organic N  
593 specifically should be considered as a possible regulatory factor in process-based ecosystem  
594 models.

595         The fate of organic carbon stored in soils and sediments, particularly at terrestrial-aquatic  
596 interfaces (Battin et al., 2009; Boulton et al., 1998; Cole et al., 2007; Marín-Spiotta et al., 2014;  
597 Regnier et al., 2013), is responsible for large amounts of uncertainty in predictions of future  
598 global biogeochemistry (Luo et al., 2016; Todd-Brown et al., 2013). Here, we provide insight  
599 into the molecular mechanisms generating hotspots of elevated aerobic metabolism in the  
600 hyporheic zone. While microbiome structure and protein expression did not vary across levels of  
601 aerobic metabolism, we found that metabolite chemistry and diverse, N-related biochemical  
602 pathways were associated with hyporheic zone hotspots. We posit that microbiome phenotypic  
603 plasticity can enable microbiomes with similar structure to expand their realized niche in  
604 response to changing environments and rapidly increase function in favorable environments.  
605 Because of fleeting environmental changes within hyporheic zones, we hypothesize that  
606 hyporheic zone microbiomes may exhibit more phenotypic plasticity than more stable  
607 ecosystems, meriting further investigation as we explore spatiotemporal dynamics across  
608 multiple systems (Fodelianakis et al., 2017). As we search for consensus on the importance of  
609 various environmental factors in predicting future biogeochemical rates (Graham et al., 2016b;  
610 Graham et al., 2014; Luo et al., 2016; Wieder et al., 2017), a spatially-explicit understanding of  
611 the mechanisms regulating organic matter transformations in areas with elevated biogeochemical  
612 rates is essential for improving the conceptualization and parameterization of ecosystem models.  
613 We propose that understanding and constraining the rates of specific metabolic pathways that

614 utilize discrete portions of resource pools is a critical consideration when advancing carbon cycle  
615 complexity in these models.

616

617 **Acknowledgements.**

618 This research was supported by the US Department of Energy (DOE), Office of  
619 Biological and Environmental Research (BER), as part of Subsurface Biogeochemical  
620 Research Program's Scientific Focus Area (SFA) at the Pacific Northwest National  
621 Laboratory (PNNL). PNNL is operated for DOE by Battelle under contract DE-AC06-76RLO  
622 1830. Data were generated under JGI/EMSL user proposal 1781. A portion of the research was  
623 performed at Environmental Molecular Science Laboratory User Facility. All data are publicly  
624 available at DOI XXXXXXXX.

625

626 **Figures.**

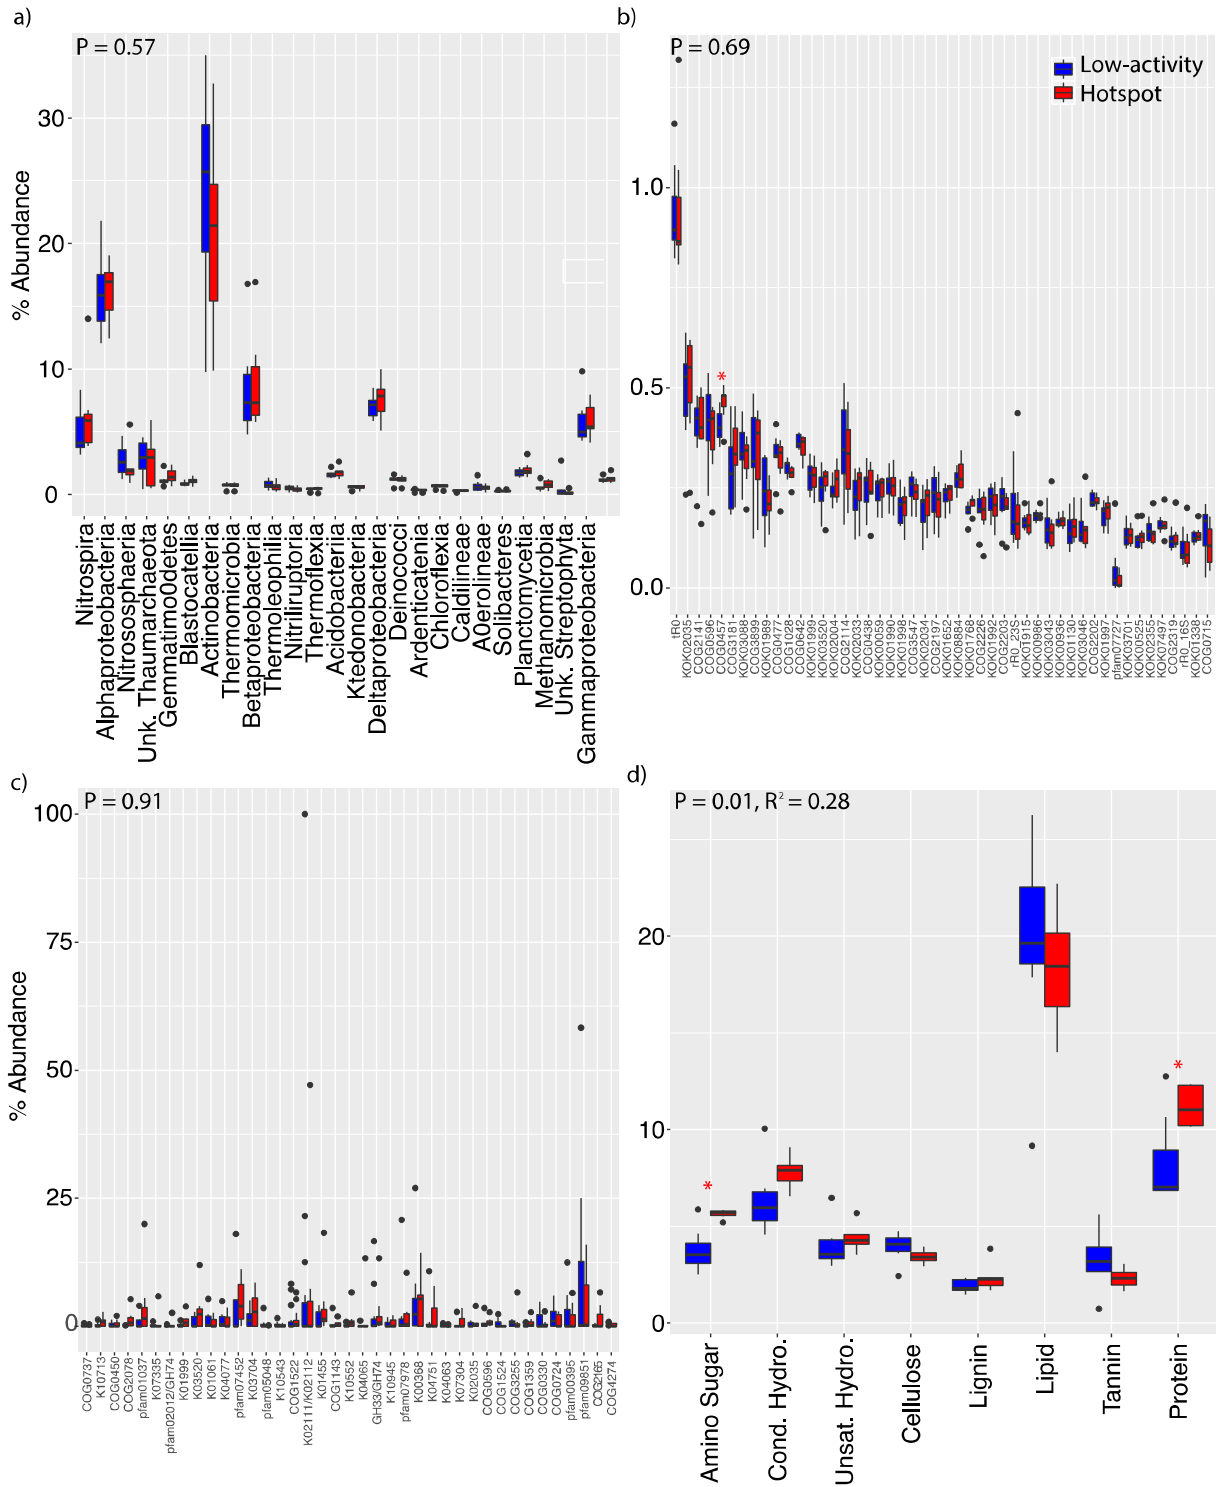

628 **Fig. 1. Multi ‘Omic Differences in Hotspots vs. Low-activity Sediments.** (a-d) show the most  
629 abundant classifications only for visual simplicity, but P-values in the upper left-hand corner of  
630 each panel are derived from all data. P-values are derived from PERMANOVA with  
631 stratification by depth.  $R^2$  values are provided for significant P-values. (a) shows abundant  
632 microorganisms (grouped at the class level), (b) shows abundant metagenomics annotations, (c)  
633 shows abundant metaproteomic identifications, and (d) shows metabolomics data grouped by  
634 compound class. Asterisks denote significant differences between hotspots and low-activity  
635 sediments, via mixed models with depth as a random effect ( $P < 0.05$ ).  
636  
637

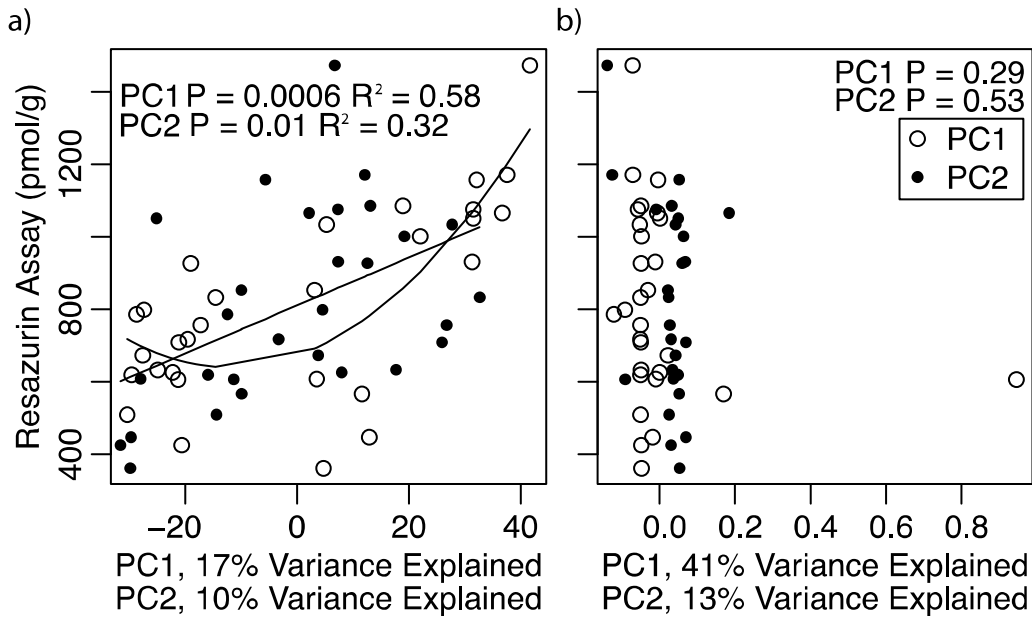

638

639 **Fig. 2. Relationships of Metabolomes and Metaproteomes with Aerobic Metabolism.** The

640 first two principle components were extracted from metabolomics and metaproteome data.

641 Correlations between each component and aerobic metabolism were determined using linear and

642 quadratic mixed models that included depth as a random effects. Regression lines are shown for

643 the best model; only significant models are shown. (a) Metabolomic data were strongly

644 correlated with aerobic metabolism, while (b) metaproteomic data were uncorrelated.

645

646

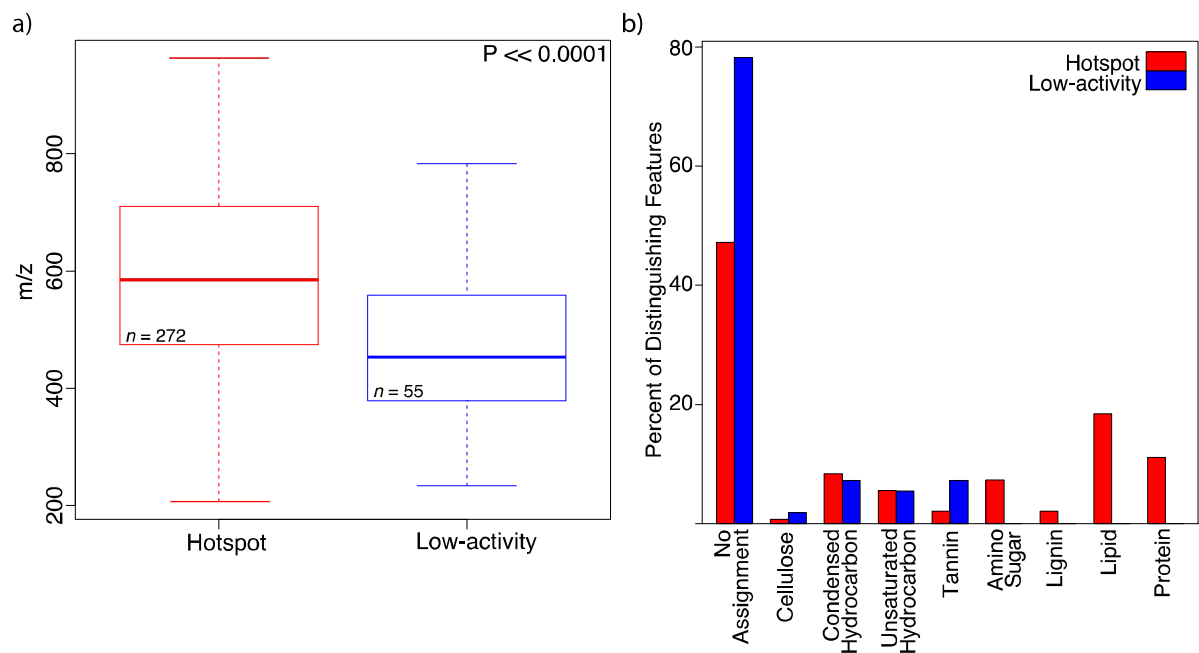

647  
648 **Fig. 3. Metabolites Distinguishing Hotspots from Low-Activity Sediments.** (a) The molecular  
649 weight of distinguishing metabolites was significantly higher in hotspots than low-activity  
650 sediments. A boxplot of molecular weights are shown, with the center line indicating the mean  
651 and the hinges of each box representing the values at the 25<sup>th</sup> and 75<sup>th</sup> percentiles. The whiskers  
652 represent the range of the data, calculated using default settings in R. P-value is derived from a  
653 one-sided Mann-Whitney U test. (b) shows the distribution of distinguishing metabolites in  
654 hotspots vs. low-activity sediments. Compounds are grouped by molecular class and displayed as  
655 a percent of distinguishing metabolites in each class.

656

657



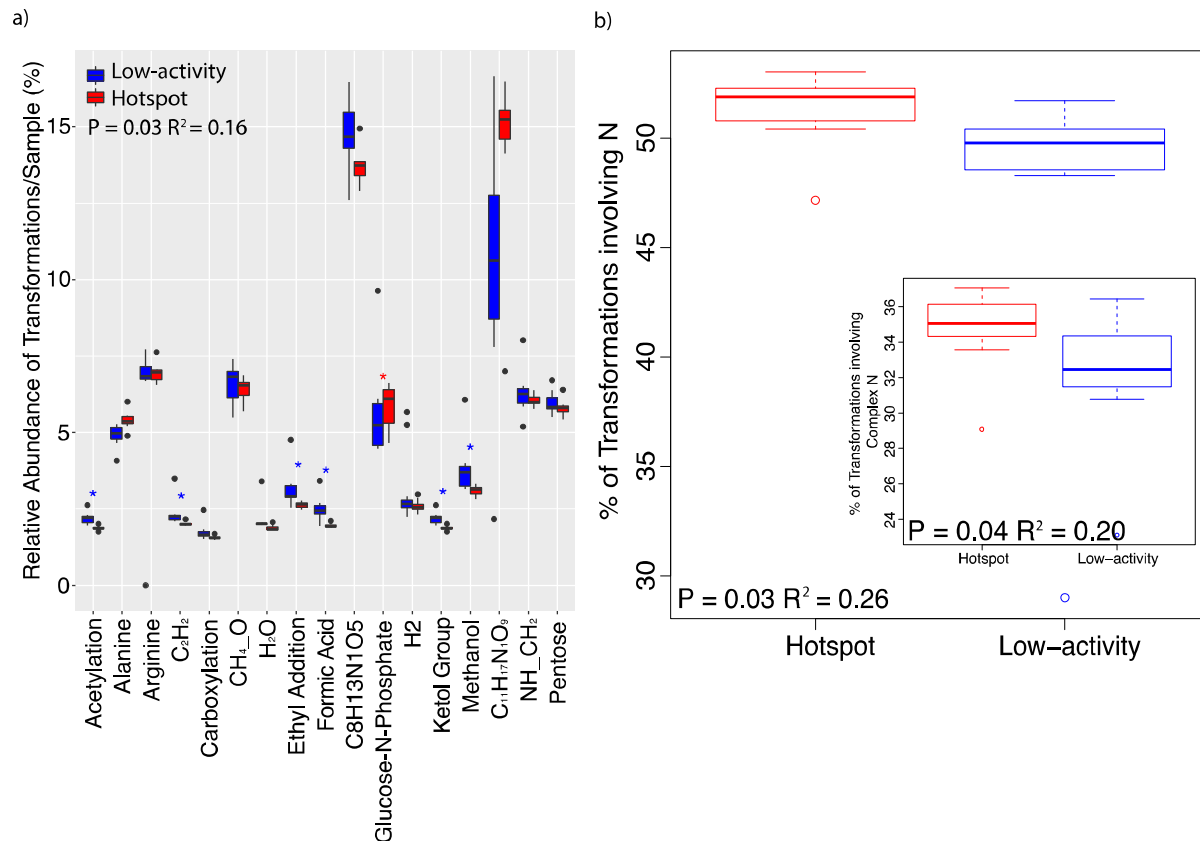

658

659 **Fig. 4. Differences in Biochemical Transformations between Hotspots and Low-activity**

660 **Sediments.** (a) shows the most abundant transformations only for visual simplicity, but the P-

661 value in the upper left-hand corner is derived from all data. Asterisks denote significant

662 differences between hotspots and low-activity sediments, via mixed models with depth as a

663 random effect ( $P < 0.05$ ). (b) shows a boxplot of the percent of transformations involving N

664 across hotspots and low-activity sediments. The inset shows the same analysis using only

665 transformations involving 'complex N'. Lists of the specific transformations included in each

666 analysis are shown in Tables S3-S6. For each boxplot, with the center line indicating the mean

667 and the hinges of each box representing the values at the 25<sup>th</sup> and 75<sup>th</sup> percentiles. The whiskers

668 represent the range of the data, calculated using default settings in R. P-values and R<sup>2</sup> are

669 calculated using mixed models with depth as a random effect. Due to non-normality in the

670 distribution of transformations, a Box-Cox transformation was applied prior to model

671 construction.

672

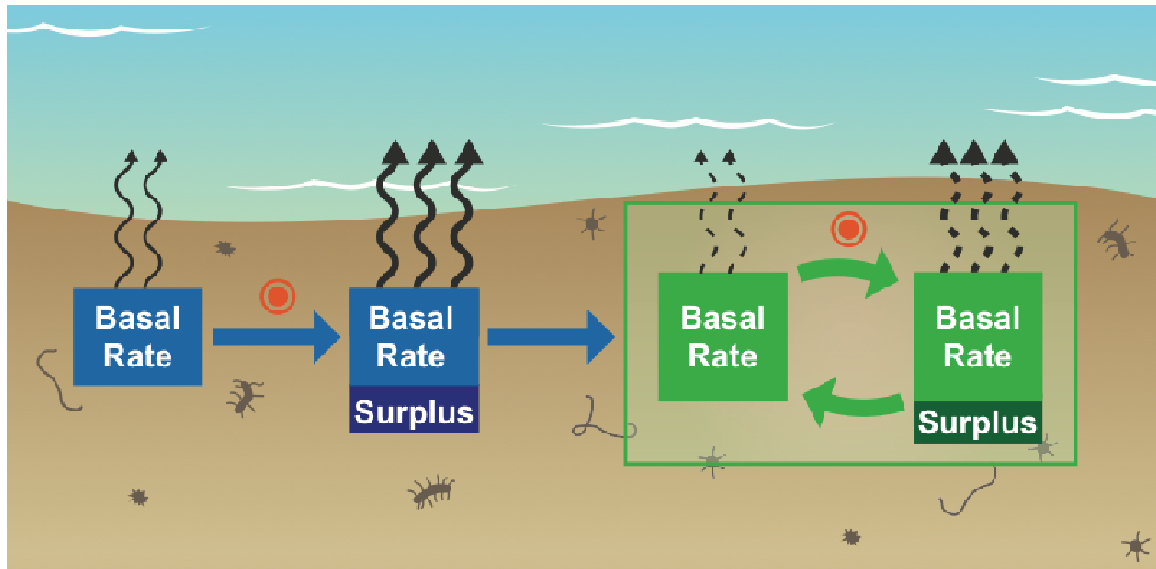

673

674 **Fig. 5. Conceptualization of a Role for Metabolic Pathways in CO<sub>2</sub> Flux Predictions.** We

675 propose that greater resolution into C metabolites and associated metabolic pathways—beyond

676 sediment bulk C and/or microbiome structure—is vital for predictive hydrobiogeochemical

677 models. Broader metabolic activity in biogeochemical hotspots stimulates the production and

678 consumption of diverse metabolites, in particular nitrogenous compounds. Therefore, there is a

679 need to incorporate subsequent feedbacks between metabolite consumption and production into

680 predictive biogeochemical models. Orange bull's eyes represent the occurrence of a hotspot or

681 hot moment. Basal rate is the baseline aerobic metabolism of sediments. Surplus metabolism

682 indicates the increase in aerobic metabolism associated with hotspots and includes stimulated

683 organic N respiration. Arrows denote CO<sub>2</sub> flux, where the number and thickness of arrow

684 denotes the relative size of the flux. Blue boxes indicate the initial condition of sediments and the

685 first occurrence of a hotspot or hot moment. Green boxes show an ongoing feedback loop in

686 which the basal rate of a microbiome is continuously influenced by metabolite production and

687 consumption.

688 **References.**

- 689 Aebersold R, Mann M. Mass spectrometry-based proteomics. *Nature* 2003; 422: 198-207.
- 690 Allison SD, Wallenstein MD, Bradford MA. Soil-carbon response to warming dependent on  
691 microbial physiology. *Nature Geoscience* 2010; 3: 336-340.
- 692 Arntzen EV, Geist DR, Dresel PE. Effects of fluctuating river flow on groundwater/surface water  
693 mixing in the hyporheic zone of a regulated, large cobble bed river. *River Research and  
694 Applications* 2006; 22: 937-946.
- 695 Averill C, Waring B. Nitrogen limitation of decomposition and decay: How can it occur? *Global  
696 change biology* 2017.
- 697 Bailey VL, Smith A, Tfaily M, Fansler SJ, Bond-Lamberty B. Differences in soluble organic  
698 carbon chemistry in pore waters sampled from different pore size domains. *Soil Biology  
699 and Biochemistry* 2017; 107: 133-143.
- 700 Balser TC, Firestone MK. Linking microbial community composition and soil processes in a  
701 California annual grassland and mixed-conifer forest. *Biogeochemistry* 2005; 73: 395-  
702 415.
- 703 Barton K. MuMIn: multi-model inference. R package version 1. 0. 0. [http://r-forge.  
704 org/projects/mumin/](http://r-forge.r-project.org/projects/mumin/) 2009.
- 705 Battin TJ, Luysaert S, Kaplan LA, Aufdenkampe AK, Richter A, Tranvik LJ. The boundless  
706 carbon cycle. *Nature Geoscience* 2009; 2: 598-600.
- 707 Boulton AJ, Findlay S, Marmonier P, Stanley EH, Valett HM. The functional significance of the  
708 hyporheic zone in streams and rivers. *Annual Review of Ecology and Systematics* 1998;  
709 29: 59-81.

- 710 Breitling R, Ritchie S, Goodenowe D, Stewart ML, Barrett MP. Ab initio prediction of metabolic  
711 networks using Fourier transform mass spectrometry data. *Metabolomics* 2006; 2: 155-  
712 164.
- 713 Buchkowski RW, Bradford MA, Grandy AS, Schmitz OJ, Wieder WR. Applying population and  
714 community ecology theory to advance understanding of belowground biogeochemistry.  
715 *Ecology letters* 2017; 20: 231-245.
- 716 Burd AB, Frey S, Cabre A, Ito T, Levine NM, Lønborg C, et al. Terrestrial and marine  
717 perspectives on modeling organic matter degradation pathways. *Global change biology*  
718 2016; 22: 121-136.
- 719 Cardenas MB, Wilson JL, Haggerty R. Residence time of bedform-driven hyporheic exchange.  
720 *Advances in Water Resources* 2008; 31: 1382-1386.
- 721 Cardinale BJ. Biodiversity improves water quality through niche partitioning. *Nature* 2011; 472:  
722 86-89.
- 723 Cole JJ, Prairie YT, Caraco NF, McDowell WH, Tranvik LJ, Striegl RG, et al. Plumbing the  
724 global carbon cycle: integrating inland waters into the terrestrial carbon budget.  
725 *Ecosystems* 2007; 10: 172-185.
- 726 Craine JM, Morrow C, Fierer N. Microbial nitrogen limitation increases decomposition. *Ecology*  
727 2007; 88: 2105-2113.
- 728 Darrouzet-Nardi A, Weintraub MN. Evidence for spatially inaccessible labile N from a  
729 comparison of soil core extractions and soil pore water lysimetry. *Soil Biology and*  
730 *Biochemistry* 2014; 73: 22-32.

- 731 Edwards IP, Zak DR, Kellner H, Eisenlord SD, Pregitzer KS. Simulated atmospheric N  
732 deposition alters fungal community composition and suppresses ligninolytic gene  
733 expression in a northern hardwood forest. *PloS one* 2011; 6: e20421.
- 734 Finn RD, Clements J, Eddy SR. HMMER web server: interactive sequence similarity searching.  
735 *Nucleic acids research* 2011; 39: W29-W37.
- 736 Fodelianakis S, Moustakas A, Papageorgiou N, Manoli O, Tsikopoulou I, Michoud G, et al.  
737 Modified niche optima and breadths explain the historical contingency of bacterial  
738 community responses to eutrophication in coastal sediments. *Molecular ecology* 2017;  
739 26: 2006-2018.
- 740 Fritz BG, Arntzen EV. Effect of rapidly changing river stage on uranium flux through the  
741 hyporheic zone. *Ground Water* 2007; 45: 753-760.
- 742 Gabor RS, Baker A, McKnight DM, Miller MP. Fluorescence indices and their interpretation.  
743 *Aquatic Organic Matter Fluorescence* 2014; 303.
- 744 Gomez-Velez JD, Harvey JW, Cardenas MB, Kiel B. Denitrification in the Mississippi River  
745 network controlled by flow through river bedforms. *Nature Geoscience* 2015; 8: 941-945.
- 746 Graham EB, Crump AR, Resch CT, Fansler S, Arntzen E, Kennedy DW, et al. Coupling  
747 spatiotemporal community assembly processes to changes in microbial metabolism.  
748 *Frontiers in Microbiology* 2016a; 7.
- 749 Graham EB, Crump AR, Resch CT, Fansler S, Arntzen E, Kennedy DW, et al. Deterministic  
750 influences exceed dispersal effects on hydrologically-connected microbiomes.  
751 *Environmental Microbiology* 2017a; 19: 1552-1567.

- 752 Graham EB, Knelman JE, Schindlbacher A, Siciliano S, Breulmann M, Yannarell A, et al.  
753 Microbes as engines of ecosystem function: when does community structure enhance  
754 predictions of ecosystem processes? *Frontiers in microbiology* 2016b; 7.
- 755 Graham EB, Tfaily MM, Crump AR, Goldman AE, Bramer L, Arntzen E, et al. Carbon inputs  
756 from riparian vegetation limit oxidation of physically-bound organic carbon via  
757 biochemical and thermodynamic processes. *Journal of Geophysical Research:*  
758 *Biogeosciences* 2017b.
- 759 Graham EB, Wieder WR, Leff JW, Weintraub SR, Townsend AR, Cleveland CC, et al. Do we  
760 need to understand microbial communities to predict ecosystem function? A comparison  
761 of statistical models of nitrogen cycling processes. *Soil Biology and Biochemistry* 2014;  
762 68: 279-282.
- 763 Haggerty R, Martí E, Argerich A, Von Schiller D, Grimm NB. Resazurin as a “smart” tracer for  
764 quantifying metabolically active transient storage in stream ecosystems. *Journal of*  
765 *Geophysical Research: Biogeosciences* 2009; 114.
- 766 Harms TK, Grimm NB. Hot spots and hot moments of carbon and nitrogen dynamics in a  
767 semiarid riparian zone. *Journal of Geophysical Research: Biogeosciences* 2008; 113.
- 768 Hartman WH, Ye R, Horwath WR, Tringe SG. A genomic perspective on stoichiometric  
769 regulation of soil carbon cycling. *The ISME journal* 2017; 11: 2652.
- 770 Hu S, Chapin III F, Firestone M, Field C, Chiariello N. Nitrogen limitation of microbial  
771 decomposition in a grassland under elevated CO<sub>2</sub>. *Nature* 2001; 409: 188.
- 772 Huizenga A, Bailey RT, Gates TK. Stream-aquifer and in-stream processes affecting nitrogen  
773 along a major river and contributing tributary. *Journal of Contaminant Hydrology* 2017;  
774 199: 24-35.

- 775 Huntemann M, Ivanova NN, Mavromatis K, Tripp HJ, Paez-Espino D, Palaniappan K, et al. The  
776 standard operating procedure of the DOE-JGI Microbial Genome Annotation Pipeline  
777 (MGAP v. 4). *Standards in genomic sciences* 2015; 10: 86.
- 778 Jian S, Li J, Chen J, Wang G, Mayes MA, Dzantor KE, et al. Soil extracellular enzyme activities,  
779 soil carbon and nitrogen storage under nitrogen fertilization: A meta-analysis. *Soil  
780 Biology and Biochemistry* 2016; 101: 32-43.
- 781 Kim S, Kramer RW, Hatcher PG. Graphical method for analysis of ultrahigh-resolution  
782 broadband mass spectra of natural organic matter, the van Krevelen diagram. *Analytical  
783 Chemistry* 2003; 75: 5336-5344.
- 784 Koch BP, Witt M, Engbrodt R, Dittmar T, Kattner G. Molecular formulae of marine and  
785 terrigenous dissolved organic matter detected by electrospray ionization Fourier  
786 transform ion cyclotron resonance mass spectrometry. *Geochimica et Cosmochimica  
787 Acta* 2005; 69: 3299-3308.
- 788 Krause S, Lewandowski J, Grimm NB, Hannah DM, Pinay G, McDonald K, et al.  
789 Ecohydrological interfaces as hotspots of ecosystem processes. *Water Resources  
790 Research* 2017.
- 791 Kuglerová L, Jansson R, Ågren A, Laudon H, Malm-Renöfält B. Groundwater discharge creates  
792 hotspots of riparian plant species richness in a boreal forest stream network. *Ecology  
793* 2014; 95: 715-725.
- 794 Kujawinski EB, Behn MD. Automated analysis of electrospray ionization Fourier transform ion  
795 cyclotron resonance mass spectra of natural organic matter. *Analytical Chemistry* 2006;  
796 78: 4363-4373.



- 797 Li D, Luo R, Liu C-M, Leung C-M, Ting H-F, Sadakane K, et al. MEGAHIT v1. 0: A fast and  
798 scalable metagenome assembler driven by advanced methodologies and community  
799 practices. *Methods* 2016; 102: 3-11.
- 800 Liaw A, Wiener M. Classification and regression by randomForest. *R news* 2002; 2: 18-22.
- 801 Lin X, McKinley J, Resch CT, Kaluzny R, Lauber CL, Fredrickson J, et al. Spatial and temporal  
802 dynamics of the microbial community in the Hanford unconfined aquifer. *The ISME*  
803 *Journal* 2012; 6: 1665-1676.
- 804 Liski J, Palosuo T, Peltoniemi M, Sievänen R. Carbon and decomposition model Yasso for forest  
805 soils. *Ecological Modelling* 2005; 189: 168-182.
- 806 Loreau M, Hector A. Partitioning selection and complementarity in biodiversity experiments.  
807 *Nature* 2001; 412: 72-76.
- 808 Lotspeich FB, Reid BH. Tri-tube freeze-core procedure for sampling stream gravels. *The*  
809 *Progressive Fish-Culturist* 1980; 42: 96-99.
- 810 Luo Y, Ahlström A, Allison SD, Batjes NH, Brovkin V, Carvalhais N, et al. Toward more  
811 realistic projections of soil carbon dynamics by Earth system models. *Global*  
812 *Biogeochemical Cycles* 2016; 30: 40-56.
- 813 Lützow Mv, Kögel-Knabner I, Ekschmitt K, Matzner E, Guggenberger G, Marschner B, et al.  
814 Stabilization of organic matter in temperate soils: mechanisms and their relevance under  
815 different soil conditions—a review. *European Journal of Soil Science* 2006; 57: 426-445.
- 816 Marín-Spiotta E, Gruley K, Crawford J, Atkinson E, Miesel J, Greene S, et al. Paradigm shifts in  
817 soil organic matter research affect interpretations of aquatic carbon cycling: transcending  
818 disciplinary and ecosystem boundaries. *Biogeochemistry* 2014; 117: 279-297.

- 819 Markley JL, Brüschweiler R, Edison AS, Eghbalnia HR, Powers R, Raftery D, et al. The future  
820 of NMR-based metabolomics. *Current opinion in biotechnology* 2017; 43: 34-40.
- 821 McClain ME, Boyer EW, Dent CL, Gergel SE, Grimm NB, Groffman PM, et al. Biogeochemical  
822 hot spots and hot moments at the interface of terrestrial and aquatic ecosystems.  
823 *Ecosystems* 2003; 6: 301-312.
- 824 Minor EC, Steinbring CJ, Longnecker K, Kujawinski EB. Characterization of dissolved organic  
825 matter in Lake Superior and its watershed using ultrahigh resolution mass spectrometry.  
826 *Organic Geochemistry* 2012; 43: 1-11.
- 827 Moorhead DL, Sinsabaugh RL. A theoretical model of litter decay and microbial interaction.  
828 *Ecological Monographs* 2006; 76: 151-174.
- 829 Moran MA, Satinsky B, Gifford SM, Luo H, Rivers A, Chan L-K, et al. Sizing up  
830 metatranscriptomics. *The ISME journal* 2013; 7: 237-243.
- 831 Moser DP, Fredrickson JK, Geist DR, Arntzen EV, Peacock AD, Li S-MW, et al.  
832 Biogeochemical processes and microbial characteristics across groundwater-surface  
833 water boundaries of the Hanford Reach of the Columbia River. *Environmental Science &*  
834 *Technology* 2003; 37: 5127-5134.
- 835 Naegeli MW, Uehlinger U. Contribution of the hyporheic zone to ecosystem metabolism in a  
836 prealpine gravel-bed-river. *Journal of the North American Benthological Society* 1997;  
837 16: 794-804.
- 838 Nicora CD, Burnum-Johnson KE, Nakayasu ES, Casey CP, III RAW, Chowdhury TR, et al. The  
839 MPLEx Protocol for Multi-omic Analyses of Soil Samples. Jove in press.

- 840 Peterson RE, Connelly MP. Water movement in the zone of interaction between groundwater  
841 and the Columbia River, Hanford site, Washington. *Journal of Hydraulic Research* 2004;  
842 42: 53-58.
- 843 Poretsky R, Rodriguez-R LM, Luo C, Tsementzi D, Konstantinidis KT. Strengths and limitations  
844 of 16S rRNA gene amplicon sequencing in revealing temporal microbial community  
845 dynamics. *PLoS One* 2014; 9: e93827.
- 846 Regnier P, Friedlingstein P, Ciais P, Mackenzie FT, Gruber N, Janssens IA, et al. Anthropogenic  
847 perturbation of the carbon fluxes from land to ocean. *Nature geoscience* 2013; 6: 597-  
848 607.
- 849 Rocca JD, Hall EK, Lennon JT, Evans SE, Waldrop MP, Cotner JB, et al. Relationships between  
850 protein-encoding gene abundance and corresponding process are commonly assumed yet  
851 rarely observed. *The ISME journal* 2015; 9: 1693-1699.
- 852 Rood K, Church M. Modified freeze-core technique for sampling the permanently wetted  
853 streambed. *North American Journal of Fisheries Management* 1994; 14: 852-861.
- 854 Sakia R. The Box-Cox transformation technique: a review. *The statistician* 1992: 169-178.
- 855 Sawyer AH, Cardenas MB. Hyporheic flow and residence time distributions in heterogeneous  
856 cross-bedded sediment. *Water Resources Research* 2009; 45.
- 857 Schade J, Fisher S, Grimm N, Seddon J. The influence of a riparian shrub on nitrogen cycling in  
858 a Sonoran Desert stream. *Ecology* 2001; 82: 3363-3376.
- 859 Schimel J, Becerra CA, Blankinship J. Estimating decay dynamics for enzyme activities in soils  
860 from different ecosystems. *Soil Biology and Biochemistry* 2017; 114: 5-11.
- 861 Schoener TW. Resource partitioning in ecological communities. *Science* 1974; 185: 27-39.

- 862 Slater LD, Ntarlagiannis D, Day-Lewis FD, Mwakanyamale K, Versteeg RJ, Ward A, et al. Use  
863 of electrical imaging and distributed temperature sensing methods to characterize surface  
864 water–groundwater exchange regulating uranium transport at the Hanford 300 Area,  
865 Washington. *Water Resources Research* 2010; 46.
- 866 Sollins P, Homann P, Caldwell BA. Stabilization and destabilization of soil organic matter:  
867 mechanisms and controls. *Geoderma* 1996; 74: 65-105.
- 868 Stegen JC, Fredrickson JK, Wilkins MJ, Konopka AE, Nelson WC, Arntzen EV, et al.  
869 Groundwater–surface water mixing shifts ecological assembly processes and stimulates  
870 organic carbon turnover. *Nature communications* 2016; 7.
- 871 Stegen JC, Johnson T, Fredrickson JK, Wilkins MJ, Konopka AE, Nelson WC, et al. Influences  
872 of organic carbon speciation on hyporheic corridor biogeochemistry and microbial  
873 ecology. *Nature Communications* 2018; 9: 585.
- 874 Stegen JC, Lin X, Konopka AE, Fredrickson JK. Stochastic and deterministic assembly  
875 processes in subsurface microbial communities. *The ISME Journal* 2012; 6: 1653-1664.
- 876 Stern N, Ginder-Vogel M, Stegen JC, Arntzen E, Kennedy DW, Larget BR, et al. Colonization  
877 habitat controls biomass, composition, and metabolic activity of attached microbial  
878 communities in the Columbia River hyporheic corridor. *Applied and Environmental*  
879 *Microbiology* 2017: AEM. 00260-17.
- 880 Tfaily MM, Chu RK, Tolić N, Roscioli KM, Anderton CR, Pas □a-Tolić L, et al. Advanced  
881 solvent based methods for molecular characterization of soil organic matter by high-  
882 resolution mass spectrometry. *Analytical chemistry* 2015; 87: 5206-5215.

- 883 Tffaily MM, Chu RK, Toyoda J, Tolić N, Robinson EW, Paša-Tolić L, et al. Sequential extraction  
884 protocol for organic matter from soils and sediments using high resolution mass  
885 spectrometry. *Analytica Chimica Acta* 2017; 972: 54-61.
- 886 Tffaily MM, Podgorski DC, Corbett JE, Chanton JP, Cooper WT. Influence of acidification on  
887 the optical properties and molecular composition of dissolved organic matter. *Analytica*  
888 *chimica acta* 2011; 706: 261-267.
- 889 Todd-Brown K, Randerson J, Post W, Hoffman F, Tarnocai C, Schuur E, et al. Causes of  
890 variation in soil carbon simulations from CMIP5 Earth system models and comparison  
891 with observations. *Biogeosciences* 2013; 10.
- 892 Tremblay LB, Dittmar T, Marshall AG, Cooper WJ, Cooper WT. Molecular characterization of  
893 dissolved organic matter in a North Brazilian mangrove porewater and mangrove-fringed  
894 estuaries by ultrahigh resolution Fourier transform-ion cyclotron resonance mass  
895 spectrometry and excitation/emission spectroscopy. *Marine chemistry* 2007; 105: 15-29.
- 896 Treseder KK. Nitrogen additions and microbial biomass: A meta-analysis of ecosystem studies.  
897 *Ecology letters* 2008; 11: 1111-1120.
- 898 Tringe SG, Rubin EM. Metagenomics: DNA sequencing of environmental samples. *Nature*  
899 *reviews genetics* 2005; 6: 805-814.
- 900 Verheijen LM, Aerts R, Brovkin V, Cavender-Bares J, Cornelissen JH, Kattge J, et al. Inclusion  
901 of ecologically based trait variation in plant functional types reduces the projected land  
902 carbon sink in an earth system model. *Global change biology* 2015; 21: 3074-3086.
- 903 Viant MR. Recent developments in environmental metabolomics. *Molecular Biosystems* 2008;  
904 4: 980-986.

- 905 Waldrop M, Firestone M. Response of microbial community composition and function to soil  
906 climate change. *Microbial ecology* 2006; 52: 716-724.
- 907 Wang G, Post WM, Mayes MA. Development of microbial-enzyme-mediated decomposition  
908 model parameters through steady-state and dynamic analyses. *Ecological Applications*  
909 2013; 23: 255-272.
- 910 Wang K, Peng C, Zhu Q, Zhou X, Wang M, Zhang K, et al. Modeling Global Soil Carbon and  
911 Soil Microbial Carbon by Integrating Microbial Processes into the Ecosystem Process  
912 Model TRIPLEX-GHG. *Journal of Advances in Modeling Earth Systems* 2017; 9: 2368-  
913 2384.
- 914 Wang Z, Gerstein M, Snyder M. RNA-Seq: a revolutionary tool for transcriptomics. *Nature*  
915 *reviews genetics* 2009; 10: 57-63.
- 916 Weintraub MN, Schimel JP. Interactions between carbon and nitrogen mineralization and soil  
917 organic matter chemistry in arctic tundra soils. *Ecosystems* 2003; 6: 0129-0143.
- 918 Wieder W, Grandy A, Kallenbach C, Bonan G. Integrating microbial physiology and physio-  
919 chemical principles in soils with the M**I**crobial-M**I**neral Carbon Stabilization (MIMICS)  
920 model. *Biogeosciences* 2014; 11: 3899-3917.
- 921 Wieder W, Grandy A, Kallenbach C, Taylor P, Bonan G. Representing life in the Earth system  
922 with soil microbial functional traits in the MIMICS model. *Geoscientific Model*  
923 *Development* 2015a; 8: 1789-1808.
- 924 Wieder WR, Bonan GB, Allison SD. Global soil carbon projections are improved by modelling  
925 microbial processes. *Nature Climate Change* 2013; 3: 909-912.
- 926 Wieder WR, Cleveland CC, Smith WK, Todd-Brown K. Future productivity and carbon storage  
927 limited by terrestrial nutrient availability. *Nature Geoscience* 2015b; 8: 441-444.

- 928 Wieder WR, Hartman MD, Sulman BN, Wang YP, Koven CD, Bonan GB. Carbon cycle  
929 confidence and uncertainty: Exploring variation among soil biogeochemical models.  
930 *Global change biology* 2017.
- 931 Xu X, Schimel JP, Thornton PE, Song X, Yuan F, Goswami S. Substrate and environmental  
932 controls on microbial assimilation of soil organic carbon: a framework for Earth system  
933 models. *Ecology letters* 2014; 17: 547-555.
- 934 Yin Y, Mao X, Yang J, Chen X, Mao F, Xu Y. dbCAN: a web resource for automated  
935 carbohydrate-active enzyme annotation. *Nucleic acids research* 2012; 40: W445-W451.
- 936 Zachara JM, Long PE, Bargar J, Davis JA, Fox P, Fredrickson JK, et al. Persistence of uranium  
937 groundwater plumes: Contrasting mechanisms at two DOE sites in the groundwater–river  
938 interaction zone. *Journal of contaminant hydrology* 2013; 147: 45-72.
- 939 Zarnetske JP, Haggerty R, Wondzell SM, Baker MA. Dynamics of nitrate production and  
940 removal as a function of residence time in the hyporheic zone. *Journal of Geophysical  
941 Research: Biogeosciences* 2011; 116.
- 942 Zhang D, Hui D, Luo Y, Zhou G. Rates of litter decomposition in terrestrial ecosystems: global  
943 patterns and controlling factors. *Journal of Plant Ecology* 2008; 1: 85-93.  
944
